# Supplementary material for: SMC5/6-mediated plasmid silencing is directed by SIMC1–SLF2 and antagonized by the SV40 large T antigen
Source: eLife. 2025 Nov 26;14:RP106815. doi: 10.7554/eLife.106815 (PMC12656486; doi:10.7554/eLife.106815)
Supplement: Figure 3—figure supplement 1—source data 1. [file elife-106815-fig3-figsupp1-data1.xlsx]

## Sheet: Sheet1
experiment I
Target	Sample	Cq	Cq Std. Dev	Cq Mean	-dCp (act-GFP)	2^(-dCp)	norm to wt			normalized data
act2	wt integrated GFP	21.7319	0.0199127	21.7397						experiment I	experiment II	experiment III
act2	wt integrated GFP	21.7623	0.0199127	21.7397					wt integrated GFP	1	1	1
act2	wt integrated GFP	21.7248	0.0199127	21.7397					SLF2-/- integrated GFP	1.10577	1.68254	0.965326
act2	SLF2-/- integrated GFP	21.8047	0.0107058	21.8104					wt episomal GFP	1	1	1
act2	SLF2-/- integrated GFP	21.8038	0.0107058	21.8104					SLF2-/- episomal GFP	0.606541	1.66251	0.944941
act2	SLF2-/- integrated GFP	21.8228	0.0107058	21.8104
act2	wt episomal GFP	21.6896	0.0174157	21.6819
act2	wt episomal GFP	21.694	0.0174157	21.6819					cell line	mean	SD	p-value
act2	wt episomal GFP	21.6619	0.0174157	21.6819					wt integrated GFP	1	0
act2	SLF2-/- episomal GFP	20.2185	0.027719	20.1974					SLF2-/- integrated GFP	1.21554	0.380084	0.316144
act2	SLF2-/- episomal GFP	20.2077	0.027719	20.1974					wt episomal GFP	1	0
act2	SLF2-/- episomal GFP	20.166	0.027719	20.1974					SLF2-/- episomal GFP	0.984034	0.539212	0.830005
GFP	wt integrated GFP	26.2187	0.0663718	26.1542	-4.41451	0.0468921	1
GFP	wt integrated GFP	26.1578	0.0663718	26.1542
GFP	wt integrated GFP	26.0861	0.0663718	26.1542
GFP	SLF2-/- integrated GFP	26.0479	0.105562	26.0799	-4.26946	0.051852	1.10577
GFP	SLF2-/- integrated GFP	26.1977	0.105562	26.0799
GFP	SLF2-/- integrated GFP	25.994	0.105562	26.0799
GFP	wt episomal GFP	17.9985	0.134046	17.8783	3.80358	13.9634	1
GFP	wt episomal GFP	17.9026	0.134046	17.8783
GFP	wt episomal GFP	17.7338	0.134046	17.8783
GFP	SLF2-/- episomal GFP	17.1306	0.0164946	17.1151	3.08226	8.46938	0.606541
GFP	SLF2-/- episomal GFP	17.0978	0.0164946	17.1151
GFP	SLF2-/- episomal GFP	17.117	0.0164946	17.1151
experiment II
act2	wt integrated GFP	22.6692	0.126616	22.543
act2	wt integrated GFP	22.5439	0.126616	22.543
act2	wt integrated GFP	22.416	0.126616	22.543
act2	SLF2-/- integrated GFP	20.8495	0.0858967	20.7695
act2	SLF2-/- integrated GFP	20.7802	0.0858967	20.7695
act2	SLF2-/- integrated GFP	20.6787	0.0858967	20.7695
act2	wt episomal GFP	21.4346	0.00525247	21.4403
act2	wt episomal GFP	21.445	0.00525247	21.4403
act2	wt episomal GFP	21.4412	0.00525247	21.4403
act2	SLF2-/- episomal GFP	21.7025	0.100908	21.767
act2	SLF2-/- episomal GFP	21.7153	0.100908	21.767
act2	SLF2-/- episomal GFP	21.8833	0.100908	21.767
GFP	wt integrated GFP	27.2803	0.0102269	27.2731	-4.73009	0.0376791	1
GFP	wt integrated GFP	27.2777	0.0102269	27.2731
GFP	wt integrated GFP	27.2614	0.0102269	27.2731
GFP	SLF2-/- integrated GFP	24.8036	0.0845486	24.7489	-3.97945	0.0633965	1.68254
GFP	SLF2-/- integrated GFP	24.7916	0.0845486	24.7489
GFP	SLF2-/- integrated GFP	24.6515	0.0845486	24.7489
GFP	wt episomal GFP	18.623	0.0362128	18.5812	2.85909	7.25558	1
GFP	wt episomal GFP	18.5607	0.0362128	18.5812
GFP	wt episomal GFP	18.5599	0.0362128	18.5812
GFP	SLF2-/- episomal GFP	18.0599	0.101962	18.1746	3.59246	12.0625	1.66251
GFP	SLF2-/- episomal GFP	18.2551	0.101962	18.1746
GFP	SLF2-/- episomal GFP	18.2086	0.101962	18.1746
experiment III
act2	wt integrated GFP	21.6178	0.0303493	21.5926
act2	wt integrated GFP	21.5589	0.0303493	21.5926
act2	wt integrated GFP	21.6009	0.0303493	21.5926
act2	SLF2-/- integrated GFP	21.991	0.0406834	21.9805
act2	SLF2-/- integrated GFP	21.9356	0.0406834	21.9805
act2	SLF2-/- integrated GFP	22.0149	0.0406834	21.9805
act2	wt episomal GFP	21.1286	0.0182383	21.1496
act2	wt episomal GFP	21.1614	0.0182383	21.1496
act2	wt episomal GFP	21.1587	0.0182383	21.1496
act2	SLF2-/- episomal GFP	21.6934	0.151207	21.5592
act2	SLF2-/- episomal GFP	21.589	0.151207	21.5592
act2	SLF2-/- episomal GFP	21.3954	0.151207	21.5592
GFP	wt integrated GFP	26.0495	0.0125104	26.0353	-4.44278	0.0459822	1
GFP	wt integrated GFP	26.0256	0.0125104	26.0353
GFP	wt integrated GFP	26.031	0.0125104	26.0353
GFP	SLF2-/- integrated GFP	26.414	0.0912691	26.4742	-4.49369	0.0443878	0.965326
GFP	SLF2-/- integrated GFP	26.5792	0.0912691	26.4742
GFP	SLF2-/- integrated GFP	26.4293	0.0912691	26.4742
GFP	wt episomal GFP	17.2048	0.0811804	17.142	4.0076	16.0845	1
GFP	wt episomal GFP	17.1708	0.0811804	17.142
GFP	wt episomal GFP	17.0503	0.0811804	17.142
GFP	SLF2-/- episomal GFP	17.7367	0.0899917	17.6333	3.9259	15.199	0.944941
GFP	SLF2-/- episomal GFP	17.5912	0.0899917	17.6333
GFP	SLF2-/- episomal GFP	17.5721	0.0899917	17.6333
