# Supplementary material for: SMC5/6-mediated plasmid silencing is directed by SIMC1–SLF2 and antagonized by the SV40 large T antigen
Source: eLife. 2025 Nov 26;14:RP106815. doi: 10.7554/eLife.106815 (PMC12656486; doi:10.7554/eLife.106815)
Supplement: Figure 3—figure supplement 1—source data 2. [file elife-106815-fig3-figsupp1-data2.xlsx]

## Sheet: Sheet1
Target	Sample	Cq	Cq Mean	Cq Std. Dev	-dCp (act-SLF2)	2^(-dCp)	norm to wt
experiment I										normalized expression
Actin	wt+pEV	17.2513	17.1512	0.0934905						experiment I	experiment II	experiment III	experiment IV	experiment V
Actin	wt+pEV	17.1365							wt+pEV	1	1	1	1	1
Actin	wt+pEV	17.0661							SLF2-/- +pEV	0.0306655	0.0345836	0.0363142	0.0297868	0.0333213
SLF2	wt+pEV	24.1632	24.2012	0.0551977	-7.05008	0.00754598	1		SLF2-/- +pSLF2	6.56306	3.67051	3.64172	3.64017	3.94655
SLF2	wt+pEV	24.1761							SLF2-/- +pSLF2mut1	10.7251	5.15837	6.49763	6.693	7.09943
SLF2	wt+pEV	24.2646
Actin	SLF2-/- +pEV	17.3617	17.3018	0.0718568						mean	SD	p-value
Actin	SLF2-/- +pEV	17.2222							wt+pEV	1	0
Actin	SLF2-/- +pEV	17.3219							SLF2-/- +pEV	0.0328449	0.0027087	6.78832e-21
SLF2	SLF2-/- +pEV	29.538	29.3792	0.139147	-12.0773	0.000231401	0.0306655		SLF2-/- +pSLF2	4.16961	1.27584	0.000419117
SLF2	SLF2-/- +pEV	29.2777							SLF2-/- +pSLF2mut1	7.02267	2.08259	0.000153629
SLF2	SLF2-/- +pEV	29.3224
Actin	SLF2-/- +pSLF2	17.0169	17.0144	0.0297239
Actin	SLF2-/- +pSLF2	16.9836
Actin	SLF2-/- +pSLF2	17.0429
SLF2	SLF2-/- +pSLF2	21.4086	21.3501	0.0793674	-4.33571	0.0495247	6.56306
SLF2	SLF2-/- +pSLF2	21.2599
SLF2	SLF2-/- +pSLF2	21.3822
Actin	SLF2-/- +pSLF2mut1	17.474	17.3072	0.144737
Actin	SLF2-/- +pSLF2mut1	17.2371
Actin	SLF2-/- +pSLF2mut1	17.2116
SLF2	SLF2-/- +pSLF2mut1	20.9394	20.9343	0.050065	-3.62716	0.0809311	10.7251
SLF2	SLF2-/- +pSLF2mut1	20.882
SLF2	SLF2-/- +pSLF2mut1	20.9817
experiment II
Actin	wt+pEV	17.4571	17.3794	0.092183
Actin	wt+pEV	17.404
Actin	wt+pEV	17.2776
SLF2	wt+pEV	24.9391	24.9852	0.046527	-7.6058	0.00513364	1
SLF2	wt+pEV	24.9845
SLF2	wt+pEV	25.0321
Actin	SLF2-/- +pEV	17.2651	17.2652	0.077392
Actin	SLF2-/- +pEV	17.3429
Actin	SLF2-/- +pEV	17.1881
SLF2	SLF2-/- +pEV	29.685	29.7248	0.0851675	-12.4596	0.00017754	0.0345836
SLF2	SLF2-/- +pEV	29.667
SLF2	SLF2-/- +pEV	29.8227
Actin	SLF2-/- +pSLF2	17.4858	17.3552	0.113569
Actin	SLF2-/- +pSLF2	17.3033
Actin	SLF2-/- +pSLF2	17.2774
SLF2	SLF2-/- +pSLF2	23.0692	23.0851	0.0145832	-5.72982	0.0188431	3.67051
SLF2	SLF2-/- +pSLF2	23.0979
SLF2	SLF2-/- +pSLF2	23.088
Actin	SLF2-/- +pSLF2mut1	17.5249	17.4122	0.108336
Actin	SLF2-/- +pSLF2mut1	17.4035
Actin	SLF2-/- +pSLF2mut1	17.3088
SLF2	SLF2-/- +pSLF2mut1	22.6203	22.6511	0.0739242	-5.23889	0.0264812	5.15837
SLF2	SLF2-/- +pSLF2mut1	22.5977
SLF2	SLF2-/- +pSLF2mut1	22.7355
experiment III
Actin	wt+pEV	17.3857	17.1997	0.160874
Actin	wt+pEV	17.1144
Actin	wt+pEV	17.1003
SLF2	wt+pEV	24.2746	24.3176	0.0440973	-7.11791	0.0071994	1
SLF2	wt+pEV	24.3154
SLF2	wt+pEV	24.3628
Actin	SLF2-/- +pEV	17.162	17.1065	0.0994368
Actin	SLF2-/- +pEV	17.1661
Actin	SLF2-/- +pEV	16.9919
SLF2	SLF2-/- +pEV	28.9788	29.0077	0.123554	-11.9012	0.000261441	0.0363142
SLF2	SLF2-/- +pEV	28.9015
SLF2	SLF2-/- +pEV	29.1434
Actin	SLF2-/- +pSLF2	17.2298	17.0935	0.154638
Actin	SLF2-/- +pSLF2	17.1264
Actin	SLF2-/- +pSLF2	16.9257
SLF2	SLF2-/- +pSLF2	22.3366	22.3468	0.0227907	-5.25329	0.0262182	3.64172
SLF2	SLF2-/- +pSLF2	22.3309
SLF2	SLF2-/- +pSLF2	22.3729
Actin	SLF2-/- +pSLF2mut1	17.2221	17.0237	0.190265
Actin	SLF2-/- +pSLF2mut1	17.0084
Actin	SLF2-/- +pSLF2mut1	16.8426
SLF2	SLF2-/- +pSLF2mut1	21.3776	21.4417	0.0714411	-4.41799	0.0467791	6.49763
SLF2	SLF2-/- +pSLF2mut1	21.4289
SLF2	SLF2-/- +pSLF2mut1	21.5187
experiment IV
Actin	wt+pEV	17.5459	17.4355	0.0956043
Actin	wt+pEV	17.3865
Actin	wt+pEV	17.3747
SLF2	wt+pEV	24.8853	24.8197	0.0568912	-7.38416	0.00598611	1
SLF2	wt+pEV	24.7899
SLF2	wt+pEV	24.7839
Actin	SLF2-/- +pEV	17.2537	17.1949	0.0544702
Actin	SLF2-/- +pEV	17.1851
Actin	SLF2-/- +pEV	17.1461
SLF2	SLF2-/- +pEV	29.7006	29.6482	0.0667673	-12.4534	0.000178307	0.0297868
SLF2	SLF2-/- +pEV	29.5731
SLF2	SLF2-/- +pEV	29.6711
Actin	SLF2-/- +pSLF2	17.1555	17.0587	0.12168
Actin	SLF2-/- +pSLF2	17.0992
Actin	SLF2-/- +pSLF2	16.9223
SLF2	SLF2-/- +pSLF2	22.5733	22.5789	0.0496404	-5.52016	0.0217905	3.64017
SLF2	SLF2-/- +pSLF2	22.5323
SLF2	SLF2-/- +pSLF2	22.6311
Actin	SLF2-/- +pSLF2mut1	17.0007	16.9666	0.0675528
Actin	SLF2-/- +pSLF2mut1	17.0105
Actin	SLF2-/- +pSLF2mut1	16.8889
SLF2	SLF2-/- +pSLF2mut1	21.6088	21.6082	0.0115033	-4.64151	0.0400651	6.693
SLF2	SLF2-/- +pSLF2mut1	21.5963
SLF2	SLF2-/- +pSLF2mut1	21.6193
experiment V
Actin	wt+pEV	18.0551	17.911	0.124541
Actin	wt+pEV	17.8395
Actin	wt+pEV	17.8392
SLF2	wt+pEV	25.0886	25.0855	0.17223	-7.17455	0.00692222	1
SLF2	wt+pEV	24.9124
SLF2	wt+pEV	25.2568
Actin	SLF2-/- +pEV	17.0803	17.1046	0.15143
Actin	SLF2-/- +pEV	17.2674
Actin	SLF2-/- +pEV	16.9676
SLF2	SLF2-/- +pEV	29.2096	29.1866	0.108264	-12.082	0.000230658	0.0333213
SLF2	SLF2-/- +pEV	29.2817
SLF2	SLF2-/- +pEV	29.0689
Actin	SLF2-/- +pSLF2	16.9006	16.971	0.129114
Actin	SLF2-/- +pSLF2	17.1203
Actin	SLF2-/- +pSLF2	16.8929
SLF2	SLF2-/- +pSLF2	22.1145	22.1649	0.172063	-5.19396	0.0273189	3.94655
SLF2	SLF2-/- +pSLF2	22.0244
SLF2	SLF2-/- +pSLF2	22.3571
Actin	SLF2-/- +pSLF2mut1	17.784	16.851	0.285355
Actin	SLF2-/- +pSLF2mut1	17.054
Actin	SLF2-/- +pSLF2mut1	16.6504
SLF2	SLF2-/- +pSLF2mut1	21.3899	21.1978	0.165972	-4.34685	0.0491438	7.09943
SLF2	SLF2-/- +pSLF2mut1	21.1008
SLF2	SLF2-/- +pSLF2mut1	21.1041
