# Supplementary material for: SMC5/6-mediated plasmid silencing is directed by SIMC1–SLF2 and antagonized by the SV40 large T antigen
Source: eLife. 2025 Nov 26;14:RP106815. doi: 10.7554/eLife.106815 (PMC12656486; doi:10.7554/eLife.106815)
Supplement: Figure 3—figure supplement 1—source data 3. [file elife-106815-fig3-figsupp1-data3.xlsx]

## Sheet: Sheet1
	experiment I		experiment II		experiment III		average	SD
cell line	GFP intensity	norm to wt	GFP intensity	norm to wt	GFP intensity	norm to wt
wt integrated GFP	8273	1	10278	1	10220	1	1	0
SLF2-/- integrated GFP	9036	1.09223	11072	1.07725	11293	1.10499	1.09149	0.0138836
wt episomal GFP	11456	1	13583	1	11020	1	1	0
SLF2-/- episomal GFP	91846	8.01728	113446	8.35206	64724	5.87332	7.41422	1.34492
	norm to wt
	I	II	III	p-value
wt episomal GFP	1	1	1
SLF2-/- episomal GFP	8.01728	8.35206	5.87332	0.00117174
