# Supplementary material for: SMC5/6-mediated plasmid silencing is directed by SIMC1–SLF2 and antagonized by the SV40 large T antigen
Source: eLife. 2025 Nov 26;14:RP106815. doi: 10.7554/eLife.106815 (PMC12656486; doi:10.7554/eLife.106815)
Supplement: Figure 3—source data 1. [file elife-106815-fig3-data1.xlsx]

## Sheet: GFP_qPCR
	experiment I
	Target	Sample	Cq	Cq Mean	Cq Std. Dev	-dCp (act-GFP)	2^(-dCp)	norm to wt
	act	wt	17.4571	17.3794	0.092183	-2.8495	0.138745	1
	act	wt	17.404								normalized expression
	act	wt	17.2776							cell line:	WT	SIMC1 -/-	SLF2 -/-
	act	SIMC1 -/-	17.4318	17.4374	0.0670318	-0.365513	0.776193	5.5944		experiment I	1	5.5944	3.68244
	act	SIMC1 -/-	17.5071							experiment II	1	10.058	5.76475
	act	SIMC1 -/-	17.3734							experiment III	1	9.4742	7.15768
	act	SLF2 -/-	17.2651	17.2652	0.077392	-0.968832	0.51092	3.68244		experiment IV	1	6.69356	4.4588
	act	SLF2 -/-	17.3429
	act	SLF2 -/-	17.1881							cell line	mean	SD	p-value
	GFP	wt	20.3412	20.2289	0.125925					WT	1	0
	GFP	wt	20.2534							SIMC1 -/-	7.72887	2.15208	0.000650466
	GFP	wt	20.0929							SLF2 -/-	5.10184	1.52604	0.00139258
	GFP	SIMC1 -/-	17.7974	17.8029	0.0715458
	GFP	SIMC1 -/-	17.7344
	GFP	SIMC1 -/-	17.8772
	GFP	SLF2 -/-	18.2552	18.2341	0.0362937
	GFP	SLF2 -/-	18.1922
	GFP	SLF2 -/-	18.2549
	experiment II
	act	wt	17.3857	17.1997	0.160874	-7.11079	0.00723503	1
	act	wt	17.1144
	act	wt	17.1003
	act	SIMC1 -/-	18.1335	18.0691	0.0565895	-3.78051	0.07277	10.058
	act	SIMC1 -/-	18.047
	act	SIMC1 -/-	18.027
	act	SLF2 -/-	17.162	17.1065	0.0994368	-4.58353	0.0417081	5.76475
	act	SLF2 -/-	17.1661
	act	SLF2 -/-	16.9919
	GFP	wt	24.3917	24.3105	0.0729899
	GFP	wt	24.2896
	GFP	wt	24.2503
	GFP	SIMC1 -/-	21.9416	21.8496	0.134694
	GFP	SIMC1 -/-	21.9127
	GFP	SIMC1 -/-	21.6952
	GFP	SLF2 -/-	21.7627	21.69	0.0820161
	GFP	SLF2 -/-	21.6012
	GFP	SLF2 -/-	21.7065
	experiment III
	act	wt	17.5459	17.4355	0.0956043	-7.70689	0.00478624	1
	act	wt	17.3865
	act	wt	17.3747
	act	SIMC1 -/-	17.491	17.3824	0.0953466	-4.46289	0.0453458	9.4742
	act	SIMC1 -/-	17.3121
	act	SIMC1 -/-	17.3446
	act	SLF2 -/-	17.2537	17.1949	0.0544702	-4.8674	0.0342584	7.15768
	act	SLF2 -/-	17.1851
	act	SLF2 -/-	17.1461
	GFP	wt	25.219	25.1424	0.102422
	GFP	wt	25.1825
	GFP	wt	25.0262
	GFP	SIMC1 -/-	21.7729	21.8453	0.12837
	GFP	SIMC1 -/-	21.9937
	GFP	SIMC1 -/-	21.7699
	GFP	SLF2 -/-	21.9422	22.0623	0.104195
	GFP	SLF2 -/-	22.1268
	GFP	SLF2 -/-	22.1183
	experiment IV
	act	wt	18.0551	17.911	0.124541	-6.84597	0.00869276	1
	act	wt	17.8395
	act	wt	17.8392
	act	SIMC1 -/-	17.6144	17.4428	0.161016	-4.1032	0.0581855	6.69356
	act	SIMC1 -/-	17.421
	act	SIMC1 -/-	17.2947
	act	SLF2 -/-	17.0803	17.1046	0.15143	-4.68931	0.0387593	4.4588
	act	SLF2 -/-	17.2674
	act	SLF2 -/-	16.9676
	GFP	wt	24.7722	24.7569	0.0243975
	GFP	wt	24.7698
	GFP	wt	24.7288
	GFP	SIMC1 -/-	21.6507	21.546	0.113228
	GFP	SIMC1 -/-	21.5621
	GFP	SIMC1 -/-	21.4259
	GFP	SLF2 -/-		21.794	0.0930419
	GFP	SLF2 -/-	21.8599
	GFP	SLF2 -/-	21.7283
