# Supplementary material for: SMC5/6-mediated plasmid silencing is directed by SIMC1–SLF2 and antagonized by the SV40 large T antigen
Source: eLife. 2025 Nov 26;14:RP106815. doi: 10.7554/eLife.106815 (PMC12656486; doi:10.7554/eLife.106815)
Supplement: Figure 3—source data 2. [file elife-106815-fig3-data2.xlsx]

## Sheet: Sheet 1
	experiment I		experiment II		experiment III		average	SD
cell line	GFP intensity	norm to wt	GFP intensity	norm to wt	GFP intensity	norm to wt
WT+pEV	9070.3	1	10568.4	1	10899.2	1	1	0
SIMC1-/-+pEV	21293.5	2.34761	21756.6	2.05865	21589.3	1.98082	2.12902	0.193258
SIMC1-/-+pSIMC1	8874.7	0.978435	8854.4	0.837818	9633.1	0.883836	0.90003	0.0716935
SLF2-/-+pEV	36874.1	4.06537	32599.1	3.08458	35038.1	3.21474	3.4549	0.532673
SLF2-/-+pSLF2	13772.9	1.51846	12051.8	1.14036	11549.3	1.05965	1.23949	0.244944
SLF2-/-+pSLF2 mut1	33111.3	3.65052	30572.8	2.89285	34715.8	3.18517	3.24285	0.382113
	I.	II.	III.
cell line	norm to wt	norm to wt	norm to wt	p-value
WT+pEV	1	1	1
SIMC1-/-+pEV	2.34761	2.05865	1.98082	0.000536893
SIMC1-/-+pSIMC1	0.978435	0.837818	0.883836	0.0731423
SLF2-/-+pEV	4.06537	3.08458	3.21474	0.00133504
SLF2-/-+pSLF2	1.51846	1.14036	1.05965	0.00281716
SLF2-/-+pSLF2 mut1	3.65052	2.89285	3.18517	0.000527195
