# Supplementary material for: SMC5/6-mediated plasmid silencing is directed by SIMC1–SLF2 and antagonized by the SV40 large T antigen
Source: eLife. 2025 Nov 26;14:RP106815. doi: 10.7554/eLife.106815 (PMC12656486; doi:10.7554/eLife.106815)
Supplement: Figure 4—source data 1. [file elife-106815-fig4-data1.xlsx]

## Sheet: Sheet1
	experiment I		experiment II		experiment III		average	SD
cell line	GFP intensity	norm to wt	GFP intensity	norm to wt	GFP intensity	norm to wt
WT+pEV	7311.6	1	7239.3	1	7711.1	1	1	0
SLF1-/-+pEV	7808.4	1.06795	7010.1	0.968339	6761	0.876788	0.971025	0.0956077
SLF1-/-+pSLF1	7171.7	0.980866	8347.9	1.15314	7963.8	1.03277	1.05559	0.0883733
	I.	II.	III.
cell line	norm to wt	norm to wt	norm to wt	p-value
WT+pEV	1	1	1
SLF1-/-+pEV	1.06795	0.968339	0.876788	0.627386
SLF1-/-+pSLF1	0.980866	1.15314	1.03277	0.337156
