# Supplementary material for: SMC5/6-mediated plasmid silencing is directed by SIMC1–SLF2 and antagonized by the SV40 large T antigen
Source: eLife. 2025 Nov 26;14:RP106815. doi: 10.7554/eLife.106815 (PMC12656486; doi:10.7554/eLife.106815)
Supplement: Figure 5—figure supplement 1—source data 2. [file elife-106815-fig5-figsupp1-data2.xlsx]

## Sheet: Sheet1
Luminescence	RPE
	DMSO	100nM	1uM
A	57553	168144	157490
B	82458	160915	160382
C	84872	171474	149436
MTT	RPE
	DMSO	100nM	1uM
A	0.5784	0.52	0.4327
B	0.5936	0.5105	0.4365
C	0.5682	0.5447	0.4406
	RPE
Luc/MTT	DMSO	100nM	1uM
A	99503.8	323354	363970
B	138912	315211	367427
C	149370	314804	339165
average	129262	317790	356854
SD	15182.2	2784.57	8900.8
p-value		0.000257967	0.000206231
