# Supplementary material for: SMC5/6-mediated plasmid silencing is directed by SIMC1–SLF2 and antagonized by the SV40 large T antigen
Source: eLife. 2025 Nov 26;14:RP106815. doi: 10.7554/eLife.106815 (PMC12656486; doi:10.7554/eLife.106815)
Supplement: Figure 5—figure supplement 1—source data 3. [file elife-106815-fig5-figsupp1-data3.xlsx]

## Sheet: Sheet1
	experiment I		experiment II		experiment III
cell line	GFP intensity	norm to wt	GFP intensity	norm to wt	GFP intensity	norm to wt	average	SD
wt integrated GFP + DMSO	10045	1	9518	1	9206	1	1	0
wt integrated GFP + SUMOi	8912	0.887208	9780	1.02753	8716	0.946774	0.953836	0.0704257
SLF2-/- integrated GFP + DMSO	11462	1.14107	11012	1.15697	9321	1.01249	1.10351	0.0792219
SLF2 -/- integrated GFP + SUMOi	10533	1.04858	10702	1.1244	8980	0.975451	1.04948	0.0744766
	norm to wt integrated GFP + DMSO:
	I	II	III	p-value
wt integrated GFP + DMSO	1	1	1
wt integrated GFP + SUMOi	0.887208	1.02753	0.946774	0.319642
SLF2-/- integrated GFP + DMSO	1.14107	1.15697	1.01249	0.0863918
SLF2 -/- integrated GFP + SUMOi	1.04858	1.1244	0.975451	0.31399
