# Supplementary material for: SMC5/6-mediated plasmid silencing is directed by SIMC1–SLF2 and antagonized by the SV40 large T antigen
Source: eLife. 2025 Nov 26;14:RP106815. doi: 10.7554/eLife.106815 (PMC12656486; doi:10.7554/eLife.106815)
Supplement: Figure 5—figure supplement 3—source data 2. [file elife-106815-fig5-figsupp3-data2.xlsx]

## Sheet: Sheet1
	experiment I		experiment II		experiment III		average	SD
cell line	GFP intensity	norm to wt	GFP intensity	norm to wt	GFP intensity	norm to wt
wt integrated GFP NT	10136	1	8531	1	8859	1	1	0
wt integrated GFP+pLT	11814	1.16555	9257	1.0851	11443	1.29168	1.18078	0.104128
SLF2-/- integrated GFP NT	11624	1.1468	9565	1.12121	9774	1.10328	1.12376	0.0218719
SLF2-/- integrated GFP+pLT	12816	1.2644	10733	1.25812	12112	1.3672	1.29657	0.0612431
