# Supplementary material for: SMC5/6-mediated plasmid silencing is directed by SIMC1–SLF2 and antagonized by the SV40 large T antigen
Source: eLife. 2025 Nov 26;14:RP106815. doi: 10.7554/eLife.106815 (PMC12656486; doi:10.7554/eLife.106815)
Supplement: Figure 5—source data 1. [file elife-106815-fig5-data1.xlsx]

## Sheet: Sheet1
	experiment I		experiment II		experiment III		experiment IV		average	SD
cell line	GFP intensity	norm to wt	GFP intensity	norm to wt	GFP intensity	norm to wt	GFP intensity	norm to wt
WT+pEV DMSO	5565	1	4175.3	1	4618.9	1	3958.3	1	1	0
WT+pEV SUMOi	25381.9	4.56099	18086.9	4.33188	17821.8	3.85845	13710.3	3.46368	4.05375	0.490227
SIMC1-/-+pEV DMSO	10644.2	1.9127	8909.7	2.13391	7342	1.58956	5933.1	1.4989	1.78377	0.293308
SIMC1-/-+pEV SUMOi	27006.1	4.85285	17707.8	4.24108	13947.3	3.01962	13872.8	3.50474	3.90457	0.807359
SLF2-/-+pEV DMSO	12529.5	2.25148	14905.8	3.56999	14181.3	3.07028	10527.8	2.65968	2.88786	0.564396
SLF2-/-+pEV SUMOi	24155.5	4.34061	24375.7	5.83807	22270.9	4.82169	18149.6	4.5852	4.89639	0.657793
	I.	II.	III.	IV.
cell line	norm to wt	norm to wt	norm to wt	norm to wt	p-value
WT+pEV DMSO	1	1	1	1
WT+pEV SUMOi	4.56099	4.33188	3.85845	3.46368
SIMC1-/-+pEV DMSO	1.9127	2.13391	1.58956	1.4989	0.00175405
SIMC1-/-+pEV SUMOi	4.85285	4.24108	3.01962	3.50474	0.762794
SLF2-/-+pEV DMSO	2.25148	3.56999	3.07028	2.65968	0.000540949
SLF2-/-+pEV SUMOi	4.34061	5.83807	4.82169	4.5852	0.0857316
