# Supplementary material for: SMC5/6-mediated plasmid silencing is directed by SIMC1–SLF2 and antagonized by the SV40 large T antigen
Source: eLife. 2025 Nov 26;14:RP106815. doi: 10.7554/eLife.106815 (PMC12656486; doi:10.7554/eLife.106815)
Supplement: Figure 5—source data 2. [file elife-106815-fig5-data2.xlsx]

## Sheet: Sheet1
	experiment I		experiment II		experiment III		average	SD
cell line	GFP intensity	norm to wt	GFP intensity	norm to wt	GFP intensity	norm to wt
WT+pEV	9070.3	1	10568.4	1	10899.2	1	1	0
PML-/-+pEV	13632.4	1.50297	12947.4	1.22511	13731.4	1.25985	1.32931	0.151395
PML-/-+pPML	12087.5	1.33265	11289.5	1.06823	13546.4	1.24288	1.21459	0.134459
	I.	II.	III.
cell line	norm to wt	norm to wt	norm to wt	p-value
WT+pEV	1	1	1
PML-/-+pEV	1.50297	1.22511	1.25985	0.0196469
PML-/-+pPML	1.33265	1.06823	1.24288	0.0506299
