# Supplementary material for: SMC5/6-mediated plasmid silencing is directed by SIMC1–SLF2 and antagonized by the SV40 large T antigen
Source: eLife. 2025 Nov 26;14:RP106815. doi: 10.7554/eLife.106815 (PMC12656486; doi:10.7554/eLife.106815)
Supplement: Figure 5—source data 4. [file elife-106815-fig5-data4.xlsx]

## Sheet: Sheet1
	experiment I		experiment II		experiment III		experiment IV		average	SD
cell line	GFP intensity	norm to wt	GFP intensity	norm to wt	GFP intensity	norm to wt	GFP intensity	norm to wt
WT+pEV	4586.5	1	3771.1	1	3713.8	1	3714.1	1	1	0
SIMC1-/-+pEV	9168.8	1.99908	6371.8	1.68964	6407.3	1.72527	6577.8	1.77103	1.79626	0.139262
SLF2-/-+pEV	10078.4	2.19741	7017.2	1.86078	8642.5	2.32713	8584.5	2.31133	2.17416	0.216764
WT+pLT	10514.3	2.29245	8191.9	2.17228	8108.6	2.18337	8012	2.15718	2.20132	0.0616901
SIMC1-/-+pLT	10343.2	2.25514	8082.8	2.14335	9927.3	2.67308	8698.1	2.34191	2.35337	0.228111
SLF2-/-+pLT	8696.4	1.89609	6983.7	1.8519	8128	2.18859	8831.5	2.37783	2.0786	0.249227
WT+pLT-HR648	10998.8	2.39808	8553.7	2.26822	8243.4	2.21967	8775.2	2.36267	2.31216	0.0825009
SIMC1-/-+pLT-HR648	9739.3	2.12347	7976.5	2.11517	7821.9	2.10617	8410.3	2.26442	2.15231	0.0750775
SLF2-/-+pLT-HR648	7807	1.70217	8248.8	2.18737	10230.3	2.75467	8812.8	2.3728	2.25425	0.437318
	I.	II.	III.	IV.
cell line	norm to wt	norm to wt	norm to wt	norm to wt	p-value
WT+pEV	1	1	1	1
SIMC1-/-+pEV	1.99908	1.68964	1.72527	1.77103	2.68306e-05
SLF2-/-+pEV	2.19741	1.86078	2.32713	2.31133	3.66275e-05
WT+pLT	2.29245	2.17228	2.18337	2.15718
SIMC1-/-+pLT	2.25514	2.14335	2.67308	2.34191	0.245543
SLF2-/-+pLT	1.89609	1.8519	2.18859	2.37783	0.376014
WT+pLT-HR648	2.39808	2.26822	2.21967	2.36267
SIMC1-/-+pLT-HR648	2.12347	2.11517	2.10617	2.26442	0.0285735
SLF2-/-+pLT-HR648	1.70217	2.18737	2.75467	2.3728	0.803375
